# Supplementary material for: A MAFG-lncRNA axis links systemic nutrient abundance to hepatic glucose metabolism
Source: PubMed Central journal article supplement (PMC6994702; doi:10.1038/s41467-020-14323-y), 2020-01-31
Supplement: 41467_2020_14323_MOESM15_ESM.pdf [file 41467_2020_14323_MOESM15_ESM.pdf]

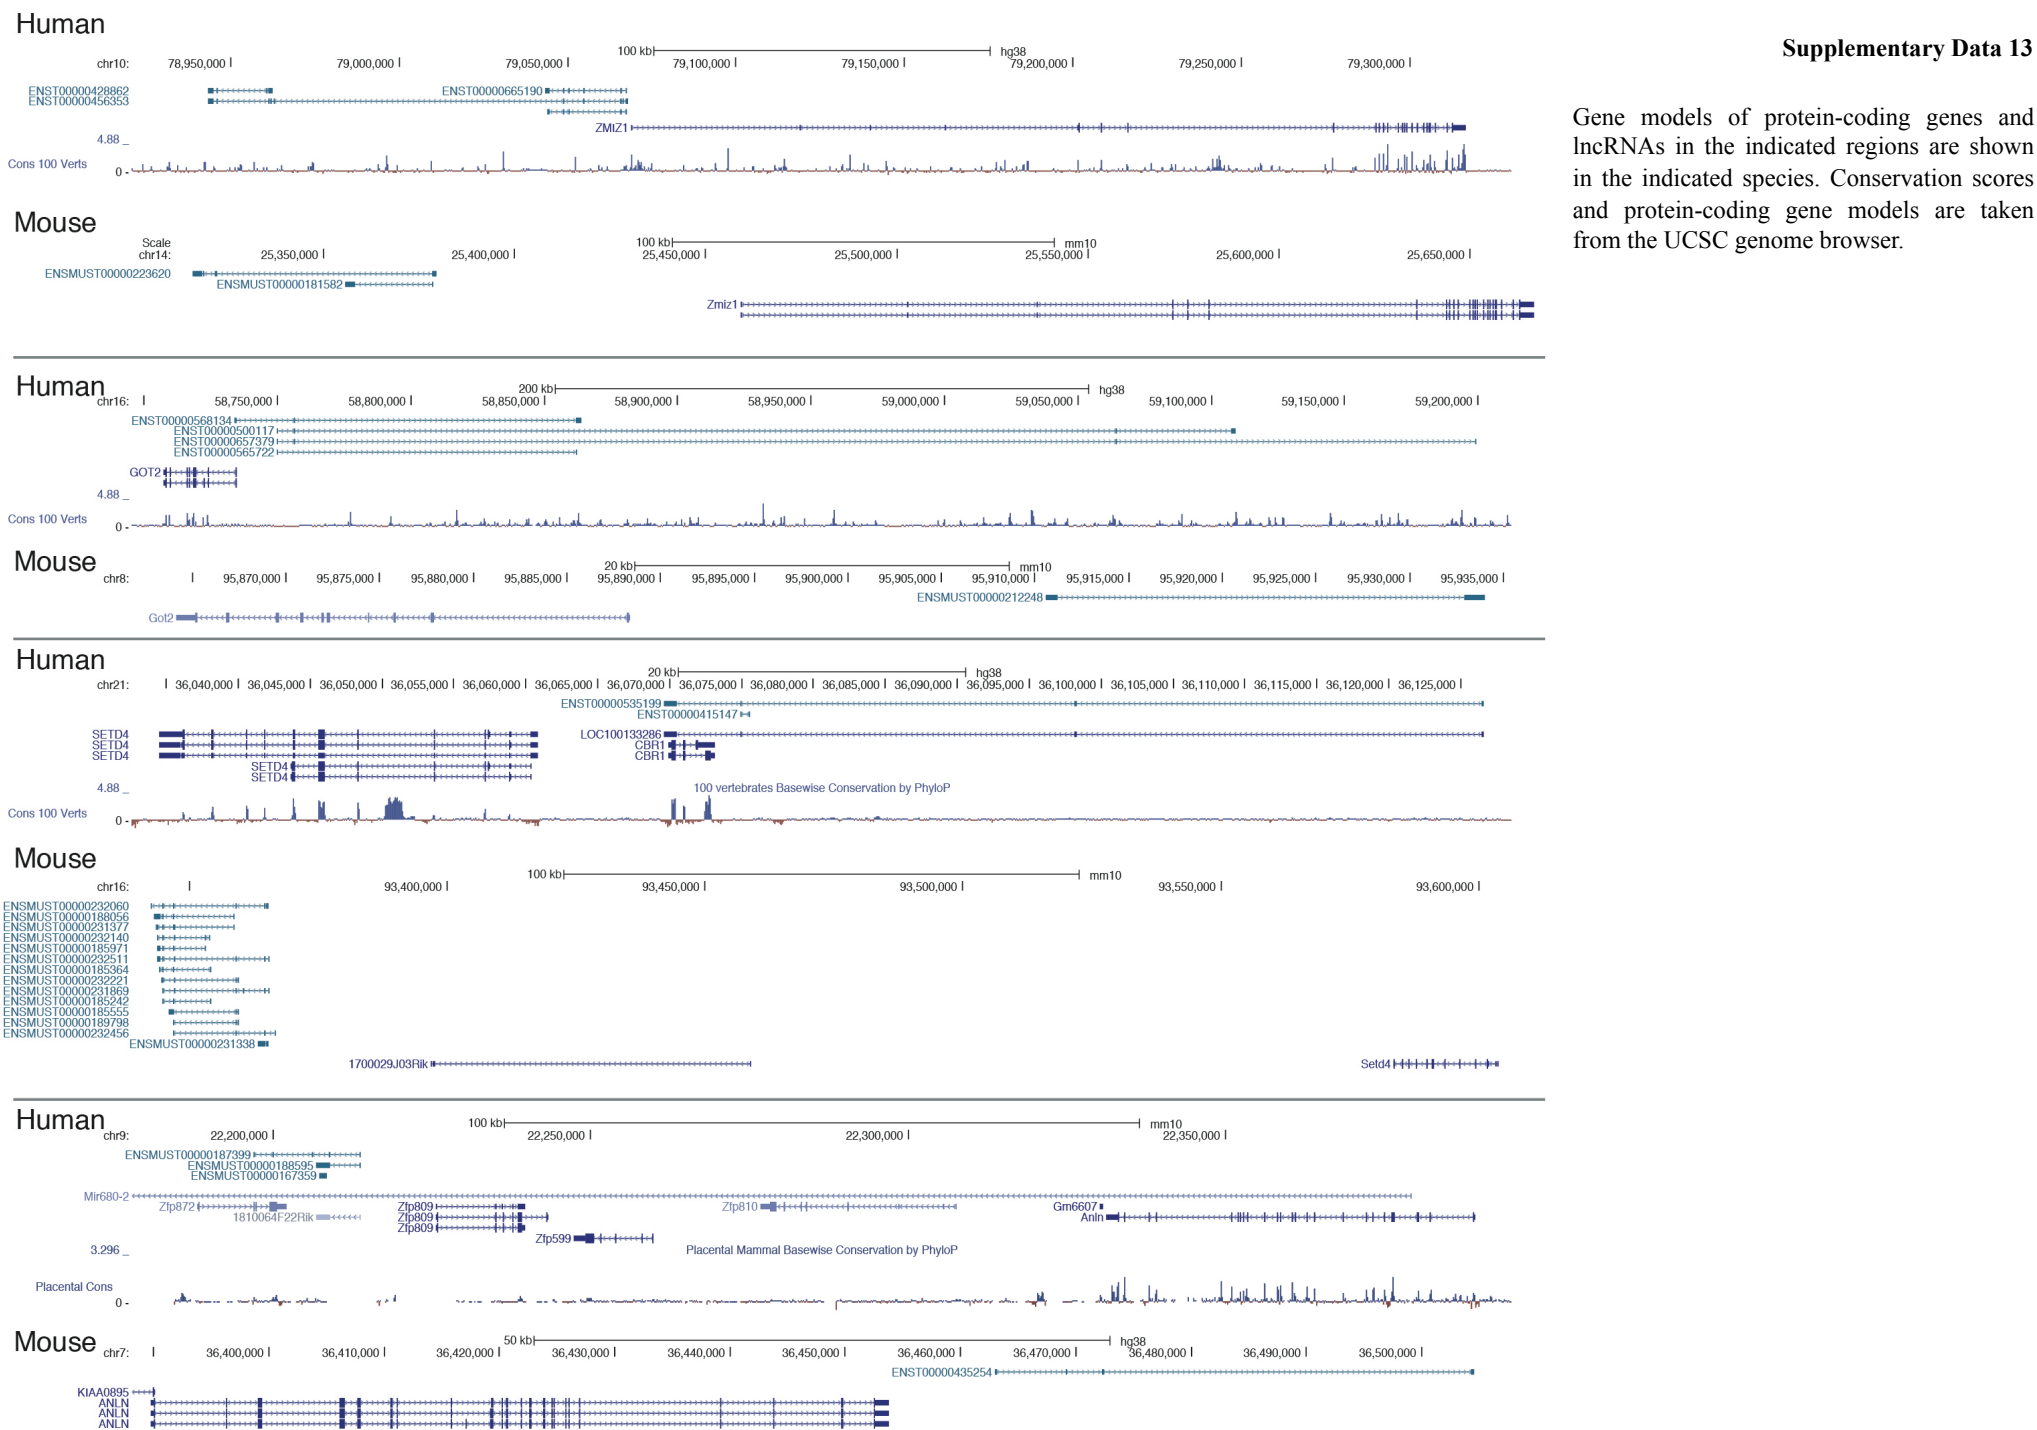

Gene models of protein-coding genes and lncRNAs in the indicated regions are shown in the indicated species. Conservation scores and protein-coding gene models are taken from the UCSC genome browser.
